# Supplementary material
Source: Springer Nature journal article supplement (https://www.springermedizin.de/resource/supplementary/12961_2008_141_MOESM1_ESM.pdf/9571524)

## Black-White Difference in Life Expectancy at Birth

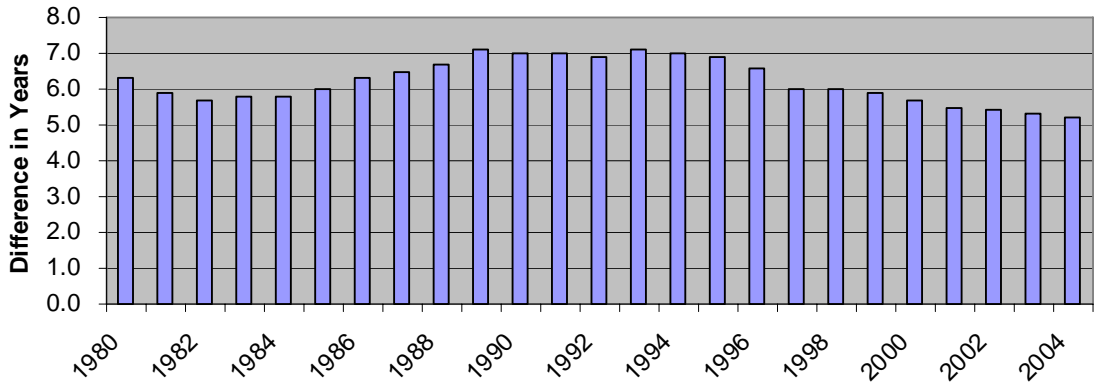

Supplement: MOESM1 [file 9571524]
